# Supplementary material
Source: PubMed Central journal article supplement (PMC2034206)
Supplement: NIHMS30925-supplement-S2.pdf [file NIHMS30925-supplement-S2.pdf]

**Supplementary Figure 2** Sound-stimulation produced significant MEMRI enhancement in auditory brainstem nuclei.

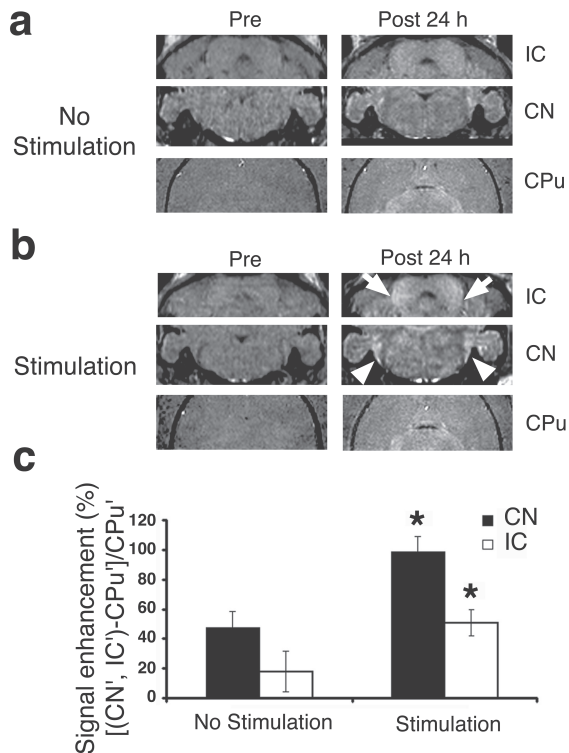

MR images were acquired before (Pre) and 24-h after (Post 24h) injection of MnCl<sub>2</sub>. For the 24-h period following MnCl<sub>2</sub> injection, mice were maintained in the acoustic isolation chamber with either no sound stimulation (**a**;  $n = 7$ ) or with sound stimulation (**b**;  $n = 7$ ). Compared to no stimulation, the mice exposed to 24-h of sound stimulation showed significant enhancement (two-tail t-test) in both inferior colliculus (IC, arrows) and cochlear nucleus (CN, arrowheads), (**c**;  $*P < 0.05$ ,  $n = 7$ ), while there was no difference in the caudate putamen (CPu). Data were analyzed by first defining the MEMRI signal change in each brain region:

$$CN' = CN_{Post} - CN_{Pre}; IC' = IC_{Post} - IC_{Pre}; CPu' = CPu_{Post} - CPu_{Pre}.$$

As in other data presented, enhancement was normalized to the CPu in each mouse: Enhancement =  $[(IC', CN') - CPu'] / CPu'$ .
