# Supplementary material
Source: PubMed Central journal article supplement (PMC2034206)
Supplement: NIHMS30925-supplement-S3.pdf [file NIHMS30925-supplement-S3.pdf]

**Supplementary Figure 3** MEMRI data showed  $Mn^{2+}$ -clearance to baseline and no influence of the previous MEMRI experiments after 3 weeks.

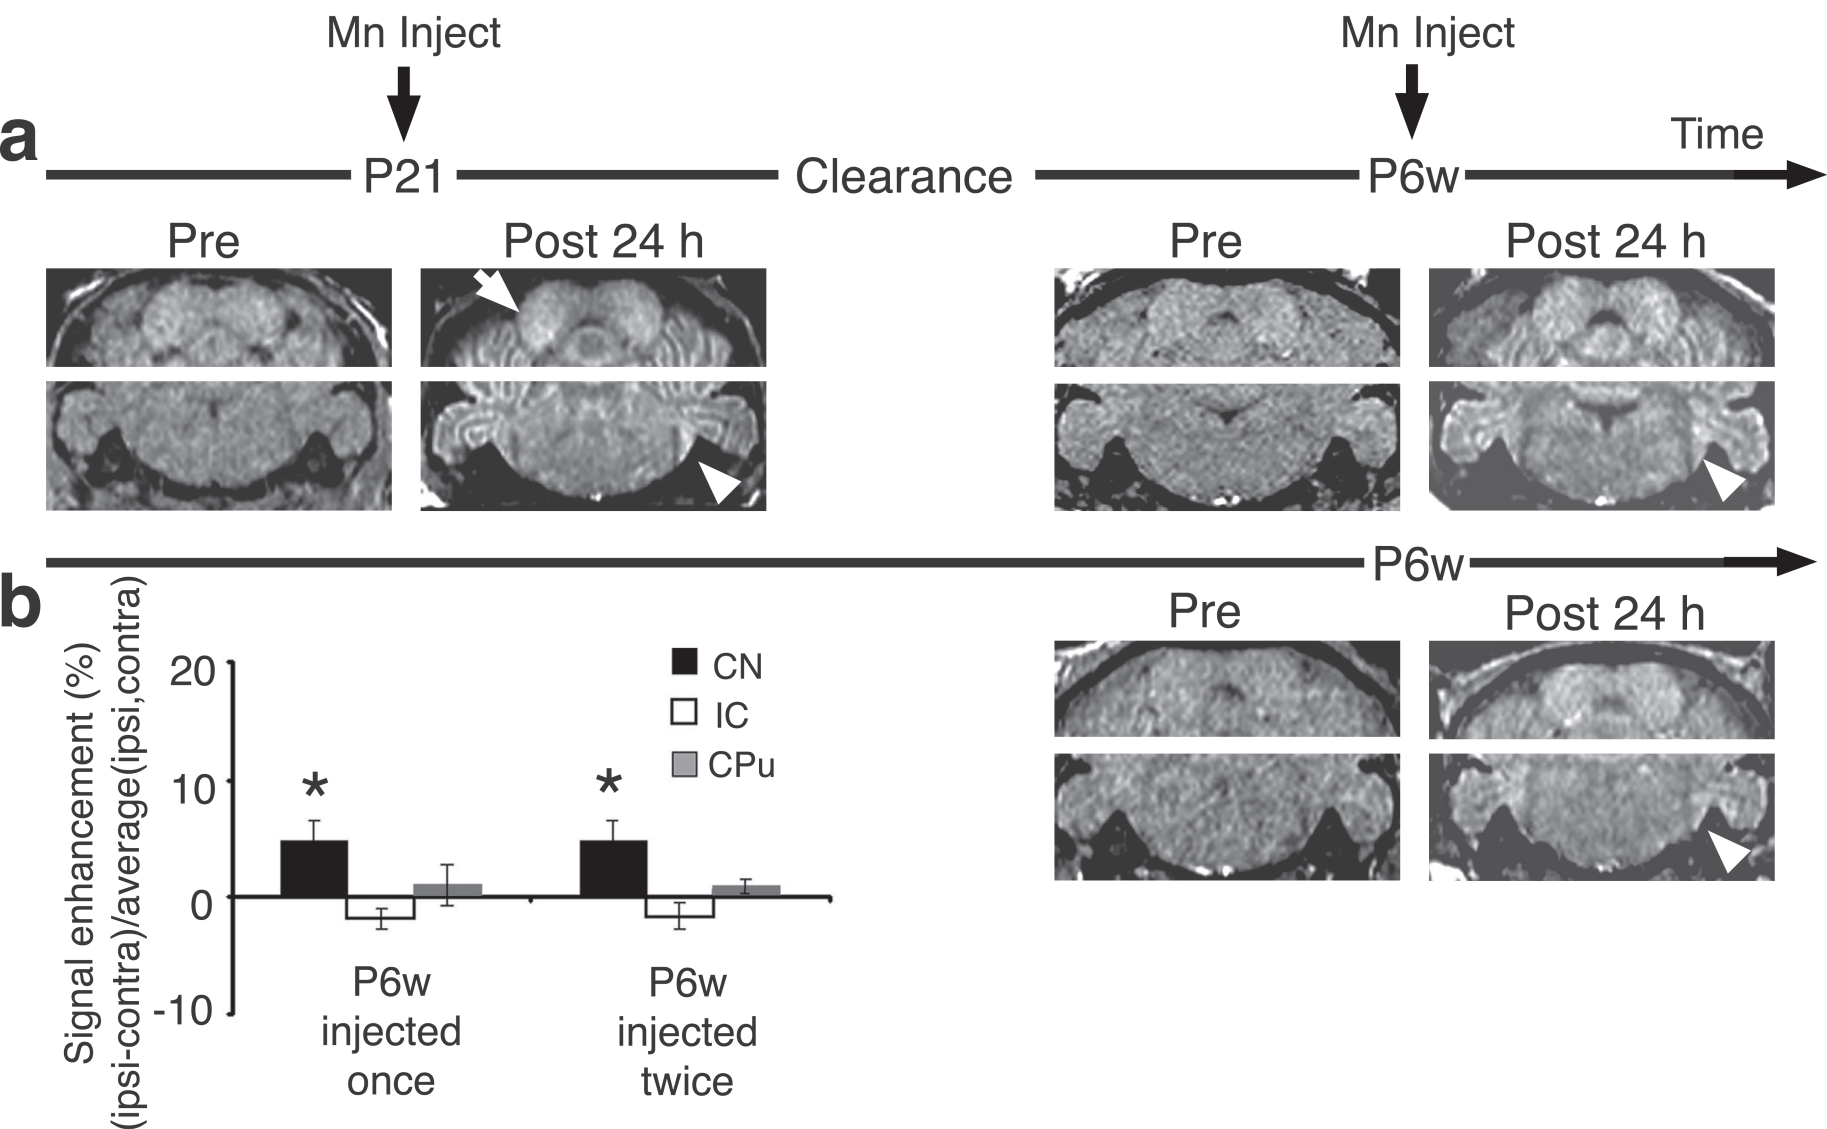

**(a)** Images are shown pre- and 24-h post-  $MnCl_2$  injection at P21 and then at P6w in the same mouse, which experienced uni-CHL at P21 (top time line). MEMRI enhancement can be seen in the ipsi-CN (arrowhead) at both P21 and P6w, and in the contra-IC (arrow), referenced to the functional ear at P21 only. The pre-scan at P6w shows that the Mn has cleared from the previous injection at P21. Images from a second mouse, acquired pre- and 24-h post-  $MnCl_2$  injection once only at P6w show similar ipsi-CN enhancement (arrowhead; bottom timeline). **(b)** Quantitative MEMRI data acquired at P6w from mice injected twice with  $MnCl_2$  at P21 and P6w ( $n = 7$ ; right) were the same as those injected only once at P6w ( $n = 7$ ; left). In both cases, enhancement was significant (two-tail t-test) only in ipsi-CN ( $*P < 0.001$ ) but not in contra-IC.
